# Supplementary material for: Does Anyone Suffer From Teenage Motherhood? Mental Health Effects of Teen Motherhood in Great Britain Are Small and Homogeneous
Source: Oxford University Press journal article supplement (doi:10.1215/00703370-10788364), 2023-05-25
Supplement: oflaherty_esm.pdf [file oflaherty_esm.pdf]

## Online Appendix

For “Does anyone suffer from teenage motherhood? Mental health effects of teen motherhood in Great Britain are small and homogeneous.”

by O’Flaherty, M., Kalucza, S., & Bon, J.

Table A1. Overview of model covariates, with topic domains and age at survey.

| Domain                                 | Age                      | Measure                                                  |                                                |
|----------------------------------------|--------------------------|----------------------------------------------------------|------------------------------------------------|
| Delinquency                            | 10                       | Fights with other children                               |                                                |
| Educational attainment and aspirations | 5                        | Estimated reading age                                    |                                                |
|                                        | 5                        | Attends school                                           |                                                |
|                                        | 5                        | In need of special education treatment                   |                                                |
|                                        | 16                       | Feels like school is largely a waste of time             |                                                |
|                                        | 16                       | Has left school                                          |                                                |
|                                        | Family history/stability | 0                                                        | Birth order                                    |
| 0                                      |                          | Duration of marriage prior to birth                      |                                                |
| 0                                      |                          | Mother's marital status at time of birth                 |                                                |
| 0                                      |                          | CM mother age at first birth                             |                                                |
| 5                                      |                          | Both bio mother/father present                           |                                                |
| 10                                     |                          | parents divorced/separated                               |                                                |
| 10                                     |                          | Number of addresses                                      |                                                |
| 16                                     |                          | Total number of siblings                                 |                                                |
| Health behaviour                       |                          | 16                                                       | Is vaccinated                                  |
|                                        | 16                       | CM age at menarche                                       |                                                |
|                                        | 16                       | Ever been on the pill?                                   |                                                |
|                                        | 16                       | CM contraceptive use                                     |                                                |
|                                        | 16                       | CM have had sex                                          |                                                |
|                                        | Family housing situation | 5                                                        | Tenure type                                    |
| 5                                      |                          | Interviewer description home - luxuriousness             |                                                |
| 5                                      |                          | Number of household appliances present                   |                                                |
| 5                                      |                          | Crowding measure - number of household members per room  |                                                |
| 5                                      |                          | Interviewer Social grouping of neighbourhood             |                                                |
| Mental health in childhood             |                          | 5                                                        | Frequent temper tantrums (once a week)         |
|                                        | 5                        | Any sleep problems                                       |                                                |
|                                        | 10                       | Appears miserable, depressed                             |                                                |
|                                        | 10                       | Diagnosed mental handicap or behavioural issue (medical) |                                                |
|                                        | 10                       | Appears worried                                          |                                                |
|                                        | 16                       | Teen changes mood quickly / drastically                  |                                                |
|                                        | 16                       | Teenager displays outbursts of temper                    |                                                |
|                                        | Orientation to the world | 10                                                       | Feeling shy or foolish when talking to teacher |
|                                        |                          | 10                                                       | Academic self concept                          |
| Parent attitudes/beliefs               | 5                        | Attitude to child independence                           |                                                |
| Peers and peer characteristics         | 10                       | Peers smokes                                             |                                                |
|                                        | 10                       | Relationship to peers in school                          |                                                |
|                                        | 10                       | Not much liked by other children (mother)                |                                                |

|                                                                                  |                                        |                                                                                                 |                                                               |
|----------------------------------------------------------------------------------|----------------------------------------|-------------------------------------------------------------------------------------------------|---------------------------------------------------------------|
| Physical health                                                                  | 0                                      | Gestational age in weeks                                                                        |                                                               |
|                                                                                  | 0                                      | Foetal distress during delivery (heart rate > 160 / < 120)                                      |                                                               |
|                                                                                  | 0                                      | Birthweight                                                                                     |                                                               |
|                                                                                  | 5                                      | Medical Condition: Hearing or Vision problem                                                    |                                                               |
|                                                                                  | 5                                      | Ever admitted to hospital                                                                       |                                                               |
|                                                                                  | 5                                      | Breastfeeding duration                                                                          |                                                               |
|                                                                                  | 10                                     | Medical condition that affects daily life or school                                             |                                                               |
|                                                                                  | 10                                     | Any diagnosed physical condition                                                                |                                                               |
|                                                                                  | 10                                     | Obesity                                                                                         |                                                               |
|                                                                                  | 10                                     | Any disabilities                                                                                |                                                               |
|                                                                                  | Parent relationship with cohort member | 5                                                                                               | Any parents reads to cohort member                            |
|                                                                                  |                                        | 10                                                                                              | Mothers interest in school (teacher answer)                   |
|                                                                                  |                                        | 10                                                                                              | How much time do you spend talking to your parents every day? |
| 10                                                                               |                                        | Parents expects too high standards/over concerned (teacher answer)                              |                                                               |
| 10                                                                               |                                        | Parents dismissive of child's potential                                                         |                                                               |
| 10                                                                               |                                        | Age at which cohort members mother think cohort member will leave school                        |                                                               |
| 16                                                                               |                                        | Are you and your husband completely happy with how your teenager is turning out?                |                                                               |
| 16                                                                               |                                        | Weekly Activities shared with parents, n                                                        |                                                               |
| 16                                                                               |                                        | Parents have visited teens school since sept 85                                                 |                                                               |
| 16                                                                               |                                        | Would like teenager to stay in full time education after this school year, and to A levels etc. |                                                               |
| 16                                                                               |                                        | Would like teenager to continue some form of fulltime education beyond age 18.                  |                                                               |
| Parental health and health behaviour (parent of cohort member)                   |                                        | 0                                                                                               | Mothers height                                                |
|                                                                                  |                                        | 0                                                                                               | Mother's smoking history - if smoked during this pregnancy    |
|                                                                                  | 5                                      | Parental Rutter Score                                                                           |                                                               |
|                                                                                  | 5                                      | Mother current smoking                                                                          |                                                               |
|                                                                                  | 16                                     | Parent total Malaise score                                                                      |                                                               |
| Parental and grandparental class/education (parent/grandparent of cohort member) | 0                                      | Mothers age at completion of full-time education                                                |                                                               |
|                                                                                  | 0                                      | Father age at completion of full-time education                                                 |                                                               |
|                                                                                  | 0                                      | Father's Social Class 1970                                                                      |                                                               |
|                                                                                  | 0                                      | Mothers's Social Class 1970                                                                     |                                                               |
|                                                                                  | 5                                      | Mother is housewife                                                                             |                                                               |
|                                                                                  | 16                                     | Combined parental income per week                                                               |                                                               |
|                                                                                  | 16                                     | Seriously troubled by financial hardship the last 12 months                                     |                                                               |

Table A2. Descriptive statistics of model covariates, over age of first birth.

|                                                             | Age at first birth<br>< 20<br>(N=589) | Age at first birth 20<br>or older<br>(N=2585) | Overall<br>(N=3174) |
|-------------------------------------------------------------|---------------------------------------|-----------------------------------------------|---------------------|
| <b>Fights with other children, age 10</b>                   |                                       |                                               |                     |
| Mean (SD)                                                   | 20.0 (23.0)                           | 15.5 (17.7)                                   | 16.3 (18.8)         |
| Median [Min, Max]                                           | 13.0 [0, 100]                         | 12.0 [0, 100]                                 | 12.0 [0, 100]       |
| Missing                                                     | 99 (16.8%)                            | 355 (13.7%)                                   | 454 (14.3%)         |
| <b>Estimated reading, age 5</b>                             |                                       |                                               |                     |
| Mean (SD)                                                   | 4.67 (1.01)                           | 4.98 (0.958)                                  | 4.92 (0.976)        |
| Median [Min, Max]                                           | 4.79 [2.05, 6.80]                     | 5.11 [2.05, 6.91]                             | 5.11 [2.05, 6.91]   |
| Missing                                                     | 177 (30.1%)                           | 854 (33.0%)                                   | 1031 (32.5%)        |
| <b>Attends school, age 5</b>                                |                                       |                                               |                     |
| no                                                          | 407 (69.1%)                           | 1796 (69.5%)                                  | 2203 (69.4%)        |
| yes                                                         | 62 (10.5%)                            | 312 (12.1%)                                   | 374 (11.8%)         |
| Missing                                                     | 120 (20.4%)                           | 477 (18.5%)                                   | 597 (18.8%)         |
| <b>In need of special education treatment, age 5</b>        |                                       |                                               |                     |
| no                                                          | 424 (72.0%)                           | 1855 (71.8%)                                  | 2279 (71.8%)        |
| yes                                                         | 7 (1.2%)                              | 27 (1.0%)                                     | 34 (1.1%)           |
| Missing                                                     | 158 (26.8%)                           | 703 (27.2%)                                   | 861 (27.1%)         |
| <b>Feels like school is largely a waste of time, age 16</b> |                                       |                                               |                     |
| no                                                          | 120 (20.4%)                           | 872 (33.7%)                                   | 992 (31.3%)         |
| yes                                                         | 114 (19.4%)                           | 422 (16.3%)                                   | 536 (16.9%)         |
| Missing                                                     | 355 (60.3%)                           | 1291 (49.9%)                                  | 1646 (51.9%)        |
| <b>Has left school, age 16</b>                              |                                       |                                               |                     |
| no                                                          | 232 (39.4%)                           | 1337 (51.7%)                                  | 1569 (49.4%)        |
| yes                                                         | 14 (2.4%)                             | 91 (3.5%)                                     | 105 (3.3%)          |
| Missing                                                     | 343 (58.2%)                           | 1157 (44.8%)                                  | 1500 (47.3%)        |
| <b>Birthorder, age 0</b>                                    |                                       |                                               |                     |
| Mean (SD)                                                   | 2.31 (1.47)                           | 2.12 (1.33)                                   | 2.16 (1.36)         |
| Median [Min, Max]                                           | 2.00 [1.00, 10.0]                     | 2.00 [1.00, 11.0]                             | 2.00 [1.00, 11.0]   |
| Missing                                                     | 49 (8.3%)                             | 175 (6.8%)                                    | 224 (7.1%)          |
| <b>Duration of marriage prior to birth, age 0</b>           |                                       |                                               |                     |
| Mean (SD)                                                   | 4.88 (4.23)                           | 5.19 (4.16)                                   | 5.14 (4.17)         |
| Median [Min, Max]                                           | 4.00 [0, 22.0]                        | 4.00 [0, 23.0]                                | 4.00 [0, 23.0]      |
| Missing                                                     | 103 (17.5%)                           | 328 (12.7%)                                   | 431 (13.6%)         |

|                                                        | Age at first birth<br>< 20<br>(N=589) | Age at first birth 20<br>or older<br>(N=2585) | Overall<br>(N=3174) |
|--------------------------------------------------------|---------------------------------------|-----------------------------------------------|---------------------|
| <b>Mother's marital status at time of birth, age 0</b> |                                       |                                               |                     |
| other                                                  | 59 (10.0%)                            | 175 (6.8%)                                    | 234 (7.4%)          |
| married                                                | 481 (81.7%)                           | 2235 (86.5%)                                  | 2716 (85.6%)        |
| Missing                                                | 49 (8.3%)                             | 175 (6.8%)                                    | 224 (7.1%)          |
| <b>Mother age at first birth, age 0</b>                |                                       |                                               |                     |
| Mean (SD)                                              | 20.6 (3.52)                           | 22.0 (3.76)                                   | 21.7 (3.75)         |
| Median [Min, Max]                                      | 20.0 [13.0, 38.0]                     | 22.0 [12.0, 42.0]                             | 21.0 [12.0, 42.0]   |
| Missing                                                | 53 (9.0%)                             | 182 (7.0%)                                    | 235 (7.4%)          |
| <b>Both bio mother/father present, age 5</b>           |                                       |                                               |                     |
| no                                                     | 73 (12.4%)                            | 207 (8.0%)                                    | 280 (8.8%)          |
| yes                                                    | 400 (67.9%)                           | 1921 (74.3%)                                  | 2321 (73.1%)        |
| Missing                                                | 116 (19.7%)                           | 457 (17.7%)                                   | 573 (18.1%)         |
| <b>Parents divorced/separated, age 10</b>              |                                       |                                               |                     |
| no                                                     | 351 (59.6%)                           | 1848 (71.5%)                                  | 2199 (69.3%)        |
| yes                                                    | 99 (16.8%)                            | 252 (9.7%)                                    | 351 (11.1%)         |
| Missing                                                | 139 (23.6%)                           | 485 (18.8%)                                   | 624 (19.7%)         |
| <b>Number of addresses, age 10</b>                     |                                       |                                               |                     |
| Mean (SD)                                              | 2.40 (1.20)                           | 2.25 (1.11)                                   | 2.28 (1.13)         |
| Median [Min, Max]                                      | 2.00 [1.00, 5.00]                     | 2.00 [1.00, 5.00]                             | 2.00 [1.00, 5.00]   |
| Missing                                                | 102 (17.3%)                           | 390 (15.1%)                                   | 492 (15.5%)         |
| <b>Total number of siblings, age 16</b>                |                                       |                                               |                     |
| Mean (SD)                                              | 1.80 (1.85)                           | 1.87 (1.75)                                   | 1.86 (1.76)         |
| Median [Min, Max]                                      | 1.00 [0, 5.00]                        | 2.00 [0, 5.00]                                | 2.00 [0, 5.00]      |
| Missing                                                | 177 (30.1%)                           | 521 (20.2%)                                   | 698 (22.0%)         |
| <b>Is vaccinated, age 16</b>                           |                                       |                                               |                     |
| no                                                     | 230 (39.0%)                           | 1026 (39.7%)                                  | 1256 (39.6%)        |
| yes                                                    | 182 (30.9%)                           | 1038 (40.2%)                                  | 1220 (38.4%)        |
| Missing                                                | 177 (30.1%)                           | 521 (20.2%)                                   | 698 (22.0%)         |
| <b>Age at menarche, age 16</b>                         |                                       |                                               |                     |
| under 12                                               | 62 (10.5%)                            | 257 (9.9%)                                    | 319 (10.1%)         |
| 12-13                                                  | 129 (21.9%)                           | 753 (29.1%)                                   | 882 (27.8%)         |
| over 13                                                | 38 (6.5%)                             | 243 (9.4%)                                    | 281 (8.9%)          |
| not started                                            | 2 (0.3%)                              | 11 (0.4%)                                     | 13 (0.4%)           |

|                                                                                   | Age at first birth<br>< 20<br>(N=589) | Age at first birth 20<br>or older<br>(N=2585) | Overall<br>(N=3174) |
|-----------------------------------------------------------------------------------|---------------------------------------|-----------------------------------------------|---------------------|
| Missing                                                                           | 358 (60.8%)                           | 1321 (51.1%)                                  | 1679 (52.9%)        |
| <b>Ever been on the pill?, age 16</b>                                             |                                       |                                               |                     |
| no                                                                                | 162 (27.5%)                           | 1016 (39.3%)                                  | 1178 (37.1%)        |
| yes                                                                               | 68 (11.5%)                            | 253 (9.8%)                                    | 321 (10.1%)         |
| Missing                                                                           | 359 (61.0%)                           | 1316 (50.9%)                                  | 1675 (52.8%)        |
| <b>Contraceptive use, age 16</b>                                                  |                                       |                                               |                     |
| contraception                                                                     | 139 (23.6%)                           | 634 (24.5%)                                   | 773 (24.4%)         |
| no sex                                                                            | 33 (5.6%)                             | 320 (12.4%)                                   | 353 (11.1%)         |
| none                                                                              | 62 (10.5%)                            | 334 (12.9%)                                   | 396 (12.5%)         |
| Missing                                                                           | 355 (60.3%)                           | 1297 (50.2%)                                  | 1652 (52.0%)        |
| <b>Have had sex, age 16</b>                                                       |                                       |                                               |                     |
| never                                                                             | 160 (27.2%)                           | 1028 (39.8%)                                  | 1188 (37.4%)        |
| once                                                                              | 11 (1.9%)                             | 80 (3.1%)                                     | 91 (2.9%)           |
| several                                                                           | 63 (10.7%)                            | 180 (7.0%)                                    | 243 (7.7%)          |
| Missing                                                                           | 355 (60.3%)                           | 1297 (50.2%)                                  | 1652 (52.0%)        |
| <b>Tenure type, age 5</b>                                                         |                                       |                                               |                     |
| owned                                                                             | 199 (33.8%)                           | 1212 (46.9%)                                  | 1411 (44.5%)        |
| rented                                                                            | 252 (42.8%)                           | 806 (31.2%)                                   | 1058 (33.3%)        |
| other                                                                             | 21 (3.6%)                             | 101 (3.9%)                                    | 122 (3.8%)          |
| Missing                                                                           | 117 (19.9%)                           | 466 (18.0%)                                   | 583 (18.4%)         |
| <b>Interviewer description home - luxiouriousness, age 5</b>                      |                                       |                                               |                     |
| low                                                                               | 41 (7.0%)                             | 63 (2.4%)                                     | 104 (3.3%)          |
| adequate                                                                          | 219 (37.2%)                           | 753 (29.1%)                                   | 972 (30.6%)         |
| high                                                                              | 203 (34.5%)                           | 1270 (49.1%)                                  | 1473 (46.4%)        |
| Missing                                                                           | 126 (21.4%)                           | 499 (19.3%)                                   | 625 (19.7%)         |
| <b>Number of household appliances present, age 5</b>                              |                                       |                                               |                     |
| Mean (SD)                                                                         | 4.62 (1.41)                           | 5.07 (1.23)                                   | 4.99 (1.27)         |
| Median [Min, Max]                                                                 | 5.00 [0, 7.00]                        | 5.00 [0, 7.00]                                | 5.00 [0, 7.00]      |
| Missing                                                                           | 116 (19.7%)                           | 457 (17.7%)                                   | 573 (18.1%)         |
| <b>Crowding measure - number resident household members / number rooms, age 5</b> |                                       |                                               |                     |
| Mean (SD)                                                                         | 0.990 (0.347)                         | 0.882 (0.297)                                 | 0.902 (0.310)       |
| Median [Min, Max]                                                                 | 1.00 [0.429, 3.00]                    | 0.800 [0.160, 3.60]                           | 0.800 [0.160, 3.60] |
| Missing                                                                           | 124 (21.1%)                           | 486 (18.8%)                                   | 610 (19.2%)         |

|                                                                         | Age at first birth<br>< 20<br>(N=589) | Age at first birth 20<br>or older<br>(N=2585) | Overall<br>(N=3174) |
|-------------------------------------------------------------------------|---------------------------------------|-----------------------------------------------|---------------------|
| <b>Interviewer Social grouping of neighbourhood, age 5</b>              |                                       |                                               |                     |
| Mean (SD)                                                               | 2.33 (0.891)                          | 2.56 (0.883)                                  | 2.52 (0.889)        |
| Median [Min, Max]                                                       | 2.00 [1.00, 4.00]                     | 2.00 [1.00, 4.00]                             | 2.00 [1.00, 4.00]   |
| Missing                                                                 | 134 (22.8%)                           | 544 (21.0%)                                   | 678 (21.4%)         |
| <b>Freq temper tantrums (once a week), age 5</b>                        |                                       |                                               |                     |
| no                                                                      | 388 (65.9%)                           | 1794 (69.4%)                                  | 2182 (68.7%)        |
| yes                                                                     | 62 (10.5%)                            | 199 (7.7%)                                    | 261 (8.2%)          |
| Missing                                                                 | 139 (23.6%)                           | 592 (22.9%)                                   | 731 (23.0%)         |
| <b>Any sleep problems, age 5</b>                                        |                                       |                                               |                     |
| no                                                                      | 343 (58.2%)                           | 1570 (60.7%)                                  | 1913 (60.3%)        |
| yes                                                                     | 127 (21.6%)                           | 544 (21.0%)                                   | 671 (21.1%)         |
| Missing                                                                 | 119 (20.2%)                           | 471 (18.2%)                                   | 590 (18.6%)         |
| <b>Appears miserable, depressed, age 10</b>                             |                                       |                                               |                     |
| Mean (SD)                                                               | 33.5 (31.1)                           | 32.6 (30.1)                                   | 32.8 (30.2)         |
| Median [Min, Max]                                                       | 18.5 [0, 100]                         | 19.0 [0, 100]                                 | 19.0 [0, 100]       |
| Missing                                                                 | 101 (17.1%)                           | 353 (13.7%)                                   | 454 (14.3%)         |
| <b>Diagnosed mental handicap or behavioural issue (medical), age 10</b> |                                       |                                               |                     |
| no                                                                      | 523 (88.8%)                           | 2357 (91.2%)                                  | 2880 (90.7%)        |
| yes                                                                     | 18 (3.1%)                             | 46 (1.8%)                                     | 64 (2.0%)           |
| Missing                                                                 | 48 (8.1%)                             | 182 (7.0%)                                    | 230 (7.2%)          |
| <b>Appears worried, age 10</b>                                          |                                       |                                               |                     |
| Mean (SD)                                                               | 22.0 (23.8)                           | 19.7 (21.2)                                   | 20.1 (21.7)         |
| Median [Min, Max]                                                       | 14.0 [0, 100]                         | 14.0 [0, 99.0]                                | 14.0 [0, 100]       |
| Missing                                                                 | 97 (16.5%)                            | 351 (13.6%)                                   | 448 (14.1%)         |
| <b>Teen changes mood quickly / drastically, age 16</b>                  |                                       |                                               |                     |
| Mean (SD)                                                               | 1.85 (0.929)                          | 1.58 (0.823)                                  | 1.63 (0.847)        |
| Median [Min, Max]                                                       | 2.00 [1.00, 4.00]                     | 1.00 [1.00, 4.00]                             | 1.00 [1.00, 4.00]   |
| Missing                                                                 | 268 (45.5%)                           | 938 (36.3%)                                   | 1206 (38.0%)        |
| <b>Teenager displays outbursts of temper, age 16</b>                    |                                       |                                               |                     |
| Mean (SD)                                                               | 1.67 (0.901)                          | 1.45 (0.739)                                  | 1.48 (0.772)        |
| Median [Min, Max]                                                       | 1.00 [1.00, 4.00]                     | 1.00 [1.00, 4.00]                             | 1.00 [1.00, 4.00]   |
| Missing                                                                 | 269 (45.7%)                           | 942 (36.4%)                                   | 1211 (38.2%)        |
| <b>Feeling shy or foolish when talking to teacher, age 10</b>           |                                       |                                               |                     |

|                                                                               | Age at first birth<br>< 20<br>(N=589) | Age at first birth 20<br>or older<br>(N=2585) | Overall<br>(N=3174)  |
|-------------------------------------------------------------------------------|---------------------------------------|-----------------------------------------------|----------------------|
| no                                                                            | 232 (39.4%)                           | 1025 (39.7%)                                  | 1257 (39.6%)         |
| yes                                                                           | 240 (40.7%)                           | 1040 (40.2%)                                  | 1280 (40.3%)         |
| Missing                                                                       | 117 (19.9%)                           | 520 (20.1%)                                   | 637 (20.1%)          |
| <b>Academic self concept, age 10</b>                                          |                                       |                                               |                      |
| Mean (SD)                                                                     | 12.4 (1.95)                           | 12.6 (1.82)                                   | 12.6 (1.85)          |
| Median [Min, Max]                                                             | 12.0 [7.00, 18.0]                     | 12.8 [7.00, 20.0]                             | 12.8 [7.00, 20.0]    |
| Missing                                                                       | 114 (19.4%)                           | 502 (19.4%)                                   | 616 (19.4%)          |
| <b>Attitude to child independence, age 5</b>                                  |                                       |                                               |                      |
| Mean (SD)                                                                     | 1.21 (0.787)                          | 1.34 (0.768)                                  | 1.32 (0.772)         |
| Median [Min, Max]                                                             | 1.18 [0.0274, 3.41]                   | 1.28 [0.00218, 3.41]                          | 1.27 [0.00218, 3.41] |
| Missing                                                                       | 223 (37.9%)                           | 785 (30.4%)                                   | 1008 (31.8%)         |
| <b>Peers smokes, age 10</b>                                                   |                                       |                                               |                      |
| most or some                                                                  | 83 (14.1%)                            | 237 (9.2%)                                    | 320 (10.1%)          |
| none                                                                          | 392 (66.6%)                           | 1843 (71.3%)                                  | 2235 (70.4%)         |
| Missing                                                                       | 114 (19.4%)                           | 505 (19.5%)                                   | 619 (19.5%)          |
| <b>Relationship to peers in school, age 10</b>                                |                                       |                                               |                      |
| Mean (SD)                                                                     | 9.00 (1.66)                           | 9.14 (1.68)                                   | 9.11 (1.68)          |
| Median [Min, Max]                                                             | 9.00 [5.00, 13.0]                     | 9.00 [5.00, 14.0]                             | 9.00 [5.00, 14.0]    |
| Missing                                                                       | 111 (18.8%)                           | 498 (19.3%)                                   | 609 (19.2%)          |
| <b>Not much liked by other children (mother), age 10</b>                      |                                       |                                               |                      |
| Mean (SD)                                                                     | 17.8 (21.6)                           | 14.8 (17.0)                                   | 15.3 (18.0)          |
| Median [Min, Max]                                                             | 12.0 [0, 100]                         | 12.0 [0, 99.0]                                | 12.0 [0, 100]        |
| Missing                                                                       | 101 (17.1%)                           | 358 (13.8%)                                   | 459 (14.5%)          |
| <b>Gestational age in weeks, age 0</b>                                        |                                       |                                               |                      |
| Mean (SD)                                                                     | 39.8 (1.84)                           | 39.8 (1.69)                                   | 39.8 (1.72)          |
| Median [Min, Max]                                                             | 40.0 [31.0, 47.0]                     | 40.0 [30.0, 47.0]                             | 40.0 [30.0, 47.0]    |
| Missing                                                                       | 167 (28.4%)                           | 652 (25.2%)                                   | 819 (25.8%)          |
| <b>Fetal distress during delivery (heart rate &gt; 160 / &lt; 120), age 0</b> |                                       |                                               |                      |
| no                                                                            | 515 (87.4%)                           | 2316 (89.6%)                                  | 2831 (89.2%)         |
| yes                                                                           | 0 (0%)                                | 7 (0.3%)                                      | 7 (0.2%)             |
| Missing                                                                       | 74 (12.6%)                            | 262 (10.1%)                                   | 336 (10.6%)          |
| <b>Birthweight, age 0</b>                                                     |                                       |                                               |                      |
| Mean (SD)                                                                     | 3220 (519)                            | 3250 (503)                                    | 3240 (506)           |

|                                                                    | Age at first birth<br>< 20<br>(N=589) | Age at first birth 20<br>or older<br>(N=2585) | Overall<br>(N=3174) |
|--------------------------------------------------------------------|---------------------------------------|-----------------------------------------------|---------------------|
| Median [Min, Max]                                                  | 3200 [1360, 5450]                     | 3260 [1020, 5390]                             | 3260 [1020, 5450]   |
| Missing                                                            | 50 (8.5%)                             | 176 (6.8%)                                    | 226 (7.1%)          |
| <b>Medical Condition: Hearing or Vision problem, age 5</b>         |                                       |                                               |                     |
| no                                                                 | 432 (73.3%)                           | 1893 (73.2%)                                  | 2325 (73.3%)        |
| yes                                                                | 41 (7.0%)                             | 235 (9.1%)                                    | 276 (8.7%)          |
| Missing                                                            | 116 (19.7%)                           | 457 (17.7%)                                   | 573 (18.1%)         |
| <b>Ever admitted to hospital, age 5</b>                            |                                       |                                               |                     |
| no                                                                 | 337 (57.2%)                           | 1470 (56.9%)                                  | 1807 (56.9%)        |
| yes                                                                | 65 (11.0%)                            | 272 (10.5%)                                   | 337 (10.6%)         |
| Missing                                                            | 187 (31.7%)                           | 843 (32.6%)                                   | 1030 (32.5%)        |
| <b>Breastfeeding duration, age 5</b>                               |                                       |                                               |                     |
| Mean (SD)                                                          | 4.03 (1.55)                           | 3.83 (1.58)                                   | 3.87 (1.58)         |
| Median [Min, Max]                                                  | 5.00 [1.00, 5.00]                     | 5.00 [1.00, 5.00]                             | 5.00 [1.00, 5.00]   |
| Missing                                                            | 122 (20.7%)                           | 471 (18.2%)                                   | 593 (18.7%)         |
| <b>Medical condition that affects daily life or school, age 10</b> |                                       |                                               |                     |
| no                                                                 | 412 (69.9%)                           | 1992 (77.1%)                                  | 2404 (75.7%)        |
| yes                                                                | 85 (14.4%)                            | 242 (9.4%)                                    | 327 (10.3%)         |
| Missing                                                            | 92 (15.6%)                            | 351 (13.6%)                                   | 443 (14.0%)         |
| <b>Any diagnosed physical condition, age 10</b>                    |                                       |                                               |                     |
| no                                                                 | 409 (69.4%)                           | 1848 (71.5%)                                  | 2257 (71.1%)        |
| yes                                                                | 132 (22.4%)                           | 555 (21.5%)                                   | 687 (21.6%)         |
| Missing                                                            | 48 (8.1%)                             | 182 (7.0%)                                    | 230 (7.2%)          |
| <b>Obesity, age 10</b>                                             |                                       |                                               |                     |
| underweight                                                        | 63 (10.7%)                            | 334 (12.9%)                                   | 397 (12.5%)         |
| normal                                                             | 352 (59.8%)                           | 1574 (60.9%)                                  | 1926 (60.7%)        |
| obese                                                              | 61 (10.4%)                            | 273 (10.6%)                                   | 334 (10.5%)         |
| Missing                                                            | 113 (19.2%)                           | 404 (15.6%)                                   | 517 (16.3%)         |
| <b>Any disabilities, age 10</b>                                    |                                       |                                               |                     |
| yes                                                                | 141 (23.9%)                           | 517 (20.0%)                                   | 658 (20.7%)         |
| no                                                                 | 330 (56.0%)                           | 1646 (63.7%)                                  | 1976 (62.3%)        |
| Missing                                                            | 118 (20.0%)                           | 422 (16.3%)                                   | 540 (17.0%)         |
| <b>Parents reads to, age 5</b>                                     |                                       |                                               |                     |
| no                                                                 | 71 (12.1%)                            | 175 (6.8%)                                    | 246 (7.8%)          |



|                                                                                                 | Age at first birth<br>< 20<br>(N=589) | Age at first birth 20<br>or older<br>(N=2585) | Overall<br>(N=3174) |
|-------------------------------------------------------------------------------------------------|---------------------------------------|-----------------------------------------------|---------------------|
| yes                                                                                             | 387 (65.7%)                           | 1905 (73.7%)                                  | 2292 (72.2%)        |
| Missing                                                                                         | 131 (22.2%)                           | 505 (19.5%)                                   | 636 (20.0%)         |
| <b>Mothers interest in school (teacher), age 10</b>                                             |                                       |                                               |                     |
| Mean (SD)                                                                                       | 2.33 (1.41)                           | 1.95 (1.30)                                   | 2.02 (1.33)         |
| Median [Min, Max]                                                                               | 2.00 [1.00, 5.00]                     | 2.00 [1.00, 5.00]                             | 2.00 [1.00, 5.00]   |
| Missing                                                                                         | 128 (21.7%)                           | 547 (21.2%)                                   | 675 (21.3%)         |
| <b>How much time do you spend talking to your parents every day?, age 10</b>                    |                                       |                                               |                     |
| not much                                                                                        | 209 (35.5%)                           | 715 (27.7%)                                   | 924 (29.1%)         |
| a lot                                                                                           | 264 (44.8%)                           | 1351 (52.3%)                                  | 1615 (50.9%)        |
| Missing                                                                                         | 116 (19.7%)                           | 519 (20.1%)                                   | 635 (20.0%)         |
| <b>Parents expects too high standards/over concerend (teacher), age 10</b>                      |                                       |                                               |                     |
| no                                                                                              | 453 (76.9%)                           | 1921 (74.3%)                                  | 2374 (74.8%)        |
| yes                                                                                             | 26 (4.4%)                             | 175 (6.8%)                                    | 201 (6.3%)          |
| Missing                                                                                         | 110 (18.7%)                           | 489 (18.9%)                                   | 599 (18.9%)         |
| <b>Parents dissmisive of childs potential, age 10</b>                                           |                                       |                                               |                     |
| no                                                                                              | 458 (77.8%)                           | 2043 (79.0%)                                  | 2501 (78.8%)        |
| yes                                                                                             | 21 (3.6%)                             | 53 (2.1%)                                     | 74 (2.3%)           |
| Missing                                                                                         | 110 (18.7%)                           | 489 (18.9%)                                   | 599 (18.9%)         |
| <b>Age mother think CM will leave school, age 10</b>                                            |                                       |                                               |                     |
| 16 years                                                                                        | 250 (42.4%)                           | 834 (32.3%)                                   | 1084 (34.2%)        |
| 17 years                                                                                        | 71 (12.1%)                            | 385 (14.9%)                                   | 456 (14.4%)         |
| 18 years                                                                                        | 153 (26.0%)                           | 890 (34.4%)                                   | 1043 (32.9%)        |
| don't know                                                                                      | 16 (2.7%)                             | 93 (3.6%)                                     | 109 (3.4%)          |
| Missing                                                                                         | 99 (16.8%)                            | 383 (14.8%)                                   | 482 (15.2%)         |
| <b>Are you and your husband completely happy with how your teenager is turning out?, age 16</b> |                                       |                                               |                     |
| no                                                                                              | 144 (24.4%)                           | 494 (19.1%)                                   | 638 (20.1%)         |
| yes                                                                                             | 182 (30.9%)                           | 1177 (45.5%)                                  | 1359 (42.8%)        |
| Missing                                                                                         | 263 (44.7%)                           | 914 (35.4%)                                   | 1177 (37.1%)        |
| <b>Weekly Activities shared with parents, n, age 16</b>                                         |                                       |                                               |                     |
| Mean (SD)                                                                                       | 1.57 (2.33)                           | 1.74 (2.22)                                   | 1.71 (2.24)         |
| Median [Min, Max]                                                                               | 0 [0, 13.0]                           | 1.00 [0, 11.0]                                | 1.00 [0, 13.0]      |
| Missing                                                                                         | 177 (30.1%)                           | 521 (20.2%)                                   | 698 (22.0%)         |
| <b>Parents have visited teens school since sept 85, age 16</b>                                  |                                       |                                               |                     |

|                                                                                                                 | Age at first birth<br>< 20<br>(N=589) | Age at first birth 20<br>or older<br>(N=2585) | Overall<br>(N=3174) |
|-----------------------------------------------------------------------------------------------------------------|---------------------------------------|-----------------------------------------------|---------------------|
| no                                                                                                              | 170 (28.9%)                           | 726 (28.1%)                                   | 896 (28.2%)         |
| yes                                                                                                             | 148 (25.1%)                           | 899 (34.8%)                                   | 1047 (33.0%)        |
| Missing                                                                                                         | 271 (46.0%)                           | 960 (37.1%)                                   | 1231 (38.8%)        |
| <b>Would like teenager to stay in full time educationa after this school year, and to A levels etc., age 16</b> |                                       |                                               |                     |
| no                                                                                                              | 225 (38.2%)                           | 1116 (43.2%)                                  | 1341 (42.2%)        |
| yes                                                                                                             | 102 (17.3%)                           | 568 (22.0%)                                   | 670 (21.1%)         |
| Missing                                                                                                         | 262 (44.5%)                           | 901 (34.9%)                                   | 1163 (36.6%)        |
| <b>Would like teenager to continue som form of fulltime education beyond age 18, age 16</b>                     |                                       |                                               |                     |
| no                                                                                                              | 274 (46.5%)                           | 1372 (53.1%)                                  | 1646 (51.9%)        |
| yes                                                                                                             | 53 (9.0%)                             | 312 (12.1%)                                   | 365 (11.5%)         |
| Missing                                                                                                         | 262 (44.5%)                           | 901 (34.9%)                                   | 1163 (36.6%)        |
| <b>Mothers height, age 0</b>                                                                                    |                                       |                                               |                     |
| Mean (SD)                                                                                                       | 160 (6.30)                            | 161 (6.51)                                    | 161 (6.47)          |
| Median [Min, Max]                                                                                               | 160 [140, 182]                        | 161 [138, 185]                                | 161 [138, 185]      |
| Missing                                                                                                         | 54 (9.2%)                             | 203 (7.9%)                                    | 257 (8.1%)          |
| <b>Mother's smoking history - if smoked during this pregnancy, age 0</b>                                        |                                       |                                               |                     |
| no                                                                                                              | 265 (45.0%)                           | 1402 (54.2%)                                  | 1667 (52.5%)        |
| yes                                                                                                             | 275 (46.7%)                           | 1008 (39.0%)                                  | 1283 (40.4%)        |
| Missing                                                                                                         | 49 (8.3%)                             | 175 (6.8%)                                    | 224 (7.1%)          |
| <b>Parental Rutter Score, age 5</b>                                                                             |                                       |                                               |                     |
| Mean (SD)                                                                                                       | 8.54 (4.88)                           | 7.37 (4.38)                                   | 7.58 (4.49)         |
| Median [Min, Max]                                                                                               | 8.00 [0, 27.0]                        | 7.00 [0, 26.0]                                | 7.00 [0, 27.0]      |
| Missing                                                                                                         | 140 (23.8%)                           | 558 (21.6%)                                   | 698 (22.0%)         |
| <b>Mother current smoking, age 5</b>                                                                            |                                       |                                               |                     |
| no                                                                                                              | 213 (36.2%)                           | 1197 (46.3%)                                  | 1410 (44.4%)        |
| yes                                                                                                             | 247 (41.9%)                           | 866 (33.5%)                                   | 1113 (35.1%)        |
| Missing                                                                                                         | 129 (21.9%)                           | 522 (20.2%)                                   | 651 (20.5%)         |
| <b>1986: (CM's parent) total Malaise score, age 16</b>                                                          |                                       |                                               |                     |
| Mean (SD)                                                                                                       | 9.19 (5.98)                           | 7.65 (5.26)                                   | 7.90 (5.41)         |
| Median [Min, Max]                                                                                               | 8.00 [0, 32.0]                        | 6.00 [0, 35.0]                                | 7.00 [0, 35.0]      |
| Missing                                                                                                         | 280 (47.5%)                           | 980 (37.9%)                                   | 1260 (39.7%)        |
| <b>Mother age completion of full-time education, age 0</b>                                                      |                                       |                                               |                     |
| <15                                                                                                             | 45 (7.6%)                             | 152 (5.9%)                                    | 197 (6.2%)          |

|                                                            | Age at first birth<br>< 20<br>(N=589) | Age at first birth 20<br>or older<br>(N=2585) | Overall<br>(N=3174) |
|------------------------------------------------------------|---------------------------------------|-----------------------------------------------|---------------------|
| 15                                                         | 352 (59.8%)                           | 1440 (55.7%)                                  | 1792 (56.5%)        |
| 16                                                         | 83 (14.1%)                            | 404 (15.6%)                                   | 487 (15.3%)         |
| 17                                                         | 25 (4.2%)                             | 162 (6.3%)                                    | 187 (5.9%)          |
| >17                                                        | 27 (4.6%)                             | 228 (8.8%)                                    | 255 (8.0%)          |
| Missing                                                    | 57 (9.7%)                             | 199 (7.7%)                                    | 256 (8.1%)          |
| <b>Father age completion of full-time education, age 0</b> |                                       |                                               |                     |
| <15                                                        | 39 (6.6%)                             | 174 (6.7%)                                    | 213 (6.7%)          |
| 15                                                         | 351 (59.6%)                           | 1342 (51.9%)                                  | 1693 (53.3%)        |
| 16                                                         | 53 (9.0%)                             | 333 (12.9%)                                   | 386 (12.2%)         |
| 17                                                         | 21 (3.6%)                             | 153 (5.9%)                                    | 174 (5.5%)          |
| >17                                                        | 36 (6.1%)                             | 285 (11.0%)                                   | 321 (10.1%)         |
| Missing                                                    | 89 (15.1%)                            | 298 (11.5%)                                   | 387 (12.2%)         |
| <b>Father's Social Class 1970, age 0</b>                   |                                       |                                               |                     |
| one                                                        | 15 (2.5%)                             | 89 (3.4%)                                     | 104 (3.3%)          |
| two                                                        | 37 (6.3%)                             | 281 (10.9%)                                   | 318 (10.0%)         |
| three, non manual                                          | 35 (5.9%)                             | 281 (10.9%)                                   | 316 (10.0%)         |
| three, manual                                              | 231 (39.2%)                           | 1096 (42.4%)                                  | 1327 (41.8%)        |
| four                                                       | 103 (17.5%)                           | 334 (12.9%)                                   | 437 (13.8%)         |
| five                                                       | 41 (7.0%)                             | 140 (5.4%)                                    | 181 (5.7%)          |
| other                                                      | 27 (4.6%)                             | 69 (2.7%)                                     | 96 (3.0%)           |
| not_supported                                              | 43 (7.3%)                             | 109 (4.2%)                                    | 152 (4.8%)          |
| Missing                                                    | 57 (9.7%)                             | 186 (7.2%)                                    | 243 (7.7%)          |
| <b>Mothers's Social Class 1970, age 0</b>                  |                                       |                                               |                     |
| one or two                                                 | 28 (4.8%)                             | 211 (8.2%)                                    | 239 (7.5%)          |
| three, non manual                                          | 133 (22.6%)                           | 691 (26.7%)                                   | 824 (26.0%)         |
| three, manual                                              | 20 (3.4%)                             | 114 (4.4%)                                    | 134 (4.2%)          |
| four                                                       | 148 (25.1%)                           | 467 (18.1%)                                   | 615 (19.4%)         |
| five                                                       | 5 (0.8%)                              | 21 (0.8%)                                     | 26 (0.8%)           |
| other                                                      | 6 (1.0%)                              | 14 (0.5%)                                     | 20 (0.6%)           |
| home duties                                                | 156 (26.5%)                           | 677 (26.2%)                                   | 833 (26.2%)         |
| Missing                                                    | 93 (15.8%)                            | 390 (15.1%)                                   | 483 (15.2%)         |
| <b>Mother housewife, age 5</b>                             |                                       |                                               |                     |
| no                                                         | 193 (32.8%)                           | 928 (35.9%)                                   | 1121 (35.3%)        |

|                                                                            | Age at first birth<br>< 20<br>(N=589) | Age at first birth 20<br>or older<br>(N=2585) | Overall<br>(N=3174) |
|----------------------------------------------------------------------------|---------------------------------------|-----------------------------------------------|---------------------|
| yes                                                                        | 276 (46.9%)                           | 1190 (46.0%)                                  | 1466 (46.2%)        |
| Missing                                                                    | 120 (20.4%)                           | 467 (18.1%)                                   | 587 (18.5%)         |
| <b>Combined parental income per week, age 16</b>                           |                                       |                                               |                     |
| <150                                                                       | 157 (26.7%)                           | 488 (18.9%)                                   | 645 (20.3%)         |
| 150-249                                                                    | 64 (10.9%)                            | 417 (16.1%)                                   | 481 (15.2%)         |
| 250-399                                                                    | 40 (6.8%)                             | 290 (11.2%)                                   | 330 (10.4%)         |
| 400+                                                                       | 12 (2.0%)                             | 111 (4.3%)                                    | 123 (3.9%)          |
| Missing                                                                    | 316 (53.7%)                           | 1279 (49.5%)                                  | 1595 (50.3%)        |
| <b>Seriously troubled by financial hardship the last 12 months, age 16</b> |                                       |                                               |                     |
| no                                                                         | 251 (42.6%)                           | 1474 (57.0%)                                  | 1725 (54.3%)        |
| yes                                                                        | 85 (14.4%)                            | 243 (9.4%)                                    | 328 (10.3%)         |
| Missing                                                                    | 253 (43.0%)                           | 868 (33.6%)                                   | 1121 (35.3%)        |
